# Supplementary material for: Blood Transcript Biomarkers Selected by Machine Learning Algorithm Classify Neurodegenerative Diseases including Alzheimer’s Disease
Source: MDPI journal article supplement (doi:10.3390/biom12111592), 2022-10-29
Supplement: s1 [file s1]

## **Supplemental Materials**

### **Blood transcript biomarkers selected by systematic machine learning algorithm classify neurodegenerative diseases including Alzheimer's disease.**

Huseby, C.J., Delvaux, E., Brokaw, D., Coleman, P.D.

Keywords: linear discriminant analysis, multivariate analysis, machine learning, Random Forest classification, Alzheimer's Disease, Huntington's Disease, Parkinson's Disease, Amyotrophic lateral sclerosis or Lou Gehrig's disease, Frontotemporal dementia, Friedreich's ataxia, blood RNA biomarkers

|           | <b>GEO dataset</b>                     | <b>description</b>                                                                                                                                                          | <b>Samples</b>                                                                                                                                                                                                                                                  | <b>Gender</b>                                                                        | <b>platform</b>                                                           | <b>references</b>              |
|-----------|----------------------------------------|-----------------------------------------------------------------------------------------------------------------------------------------------------------------------------|-----------------------------------------------------------------------------------------------------------------------------------------------------------------------------------------------------------------------------------------------------------------|--------------------------------------------------------------------------------------|---------------------------------------------------------------------------|--------------------------------|
| AD1       | GSE63060<br>Nov 6, 2014<br>May 3, 2019 | AD MCI HC<br>AddNeuroMed Cohort (batch 1)<br>Western European/Caucasian<br>Whole blood                                                                                      | 329 samples:<br>104 HC<br>145 AD<br>80 MCI                                                                                                                                                                                                                      | 62F 42M<br>99F 46M<br>39F 41M                                                        | GPL6947 Illumina HumanHT-12<br>V3.0 expression beadchip                   | [1, 2]                         |
| AD2       | GSE63061                               | AD MCI HC<br>AddNeuroMed Cohort (batch 2)<br>Western European/European mix<br>Whole blood                                                                                   | 382 samples:<br>134 HC<br>139 AD<br>109 MCI                                                                                                                                                                                                                     | 81F 53M<br>85F 54M<br>65F 44M                                                        | GPL10558 Illumina HumanHT-12<br>V4.0 expression beadchip                  | [1]                            |
| PD1       | GSE57475                               | PD HC<br>Blood a-synuclein, gene expression<br>and smell testing as diagnostic and<br>prognostic biomarkers in PD study<br>from 22 US tertiary care centers.<br>Whole blood | 142 samples<br>49 HC<br>93 PD – Dopamine transporter imaging confirmed.                                                                                                                                                                                         | 23F 26M<br>31F 62M                                                                   | GPL6947 Illumina HumanHT-12<br>V3.0 expression beadchip                   | [3]                            |
| PD2<br>HD | GSE99039                               | PD HC HD other<br>GENEPARK consortium<br>Whole blood                                                                                                                        | 558 samples:<br><b>233 healthy control (HC)</b><br><b>205 idiopathic Parkinson's Disease (PD)</b><br><b>27 Huntington's Disease (HD)</b><br>22 Genetic PD unaffected (GENUA)<br>41 Genetic PD affected (GPD)<br>30 MSA, PSP and other neurodegenerative disease | 142F 70M 21NA<br>90F 101M 14NA<br>11F 8M 8NA<br>8F 11M 3NA<br>19F 22M<br>11F 12M 7NA | GPL570 (HG-U133_Plus_2)<br>Affymetrix Human Genome U133<br>Plus 2.0 Array | [4]                            |
| ALS1      | GSE112676                              | ALS HC<br>Tertiary referral center for motor<br>neuron diseases University Medical<br>Center Utrecht, The Netherlands.<br>Whole blood at diagnosis                          | 741 samples:<br>508 HC<br>233 ALS<br>143 spinal<br>90 bulbar                                                                                                                                                                                                    | 230F 278M<br>90F 143M<br>48F 95M<br>42F 48M                                          | GPL6947 Illumina HumanHT-12<br>V3.0 expression beadchip                   | [5, 6]                         |
| ALS2      | GSE112680                              | ALS HC MIMICS<br>Whole blood                                                                                                                                                | 376 samples:<br>137 HC<br>164 ALS<br>108 spinal<br>56 bulbar<br>75 MIMICS                                                                                                                                                                                       | 58F 79M<br>68F 96M<br>31F 77M<br>37F 19M<br>17F 58M                                  | Illumina GPL10558 HumanHT-12<br>V4.0 expression beadchip                  | [5, 6]                         |
| FRDA      | GSE102008                              | FRDA HC CARRIERS<br>UCLA and Children's Hospital of<br>Philadelphia<br>Whole blood                                                                                          | 733 samples:<br>94 HC<br>411 FRDA<br>228 CARRIERS                                                                                                                                                                                                               | 40F 54M<br>192F 219M<br>141F 87M                                                     | Illumina GPL10558 HumanHT-12<br>V4.0 expression beadchip                  | [7, 8]                         |
| FTA       | GSE140830                              | bvFTD HC other dementia<br>UCLA, UCSF<br>Whole blood                                                                                                                        | 542 samples<br>281 HC<br>80 bvFTD<br>47 nfVPPA<br>54 PSP<br>44 svPPA<br>36 CBS                                                                                                                                                                                  | 156F 125 M<br>35F 45M<br>28F 19M<br>29F 25M<br>21F 23M<br>20F 16M                    | GPL15988 Illumina HumanHT-12<br>V4.0 expression beadchip<br>nuID          | [9]; Nachun, D.<br>etal., 2019 |
| AD3       | GSE140829                              | AD MCI HC<br>UCLA, UCSF<br>Whole blood                                                                                                                                      | 587 samples<br>249 HC<br>204 AD<br>134 MCI                                                                                                                                                                                                                      | 104F 100M<br>139F 110 M<br>62F 72M                                                   | GPL15988 Illumina HumanHT-12<br>V4.0 expression beadchip<br>nuID          | [9]; Nachun, D.<br>etal., 2019 |

**Table S1.** Characteristics of RNA expression data sets used in this study. HC-health[3, 9]y control, AD-Alzheimer's disease, MCI-mild cognitive impairment, PD-Parkinson's disease, ALS- amyotrophic lateral sclerosis, MIMIC-diseases mimicking ALS, FRDA-Friedreich's ataxia, CARRIERS-heterozygous unaffected carriers of FRDA, bvFTD-behavioral variant frontotemporal dementia, nfVPPA-\_\_\_\_\_, PSP-\_\_\_\_\_, svPPA-\_\_\_\_\_, CBS-\_\_\_\_\_. Dates reflect data submission to GEO and last update since November 24, 2020.

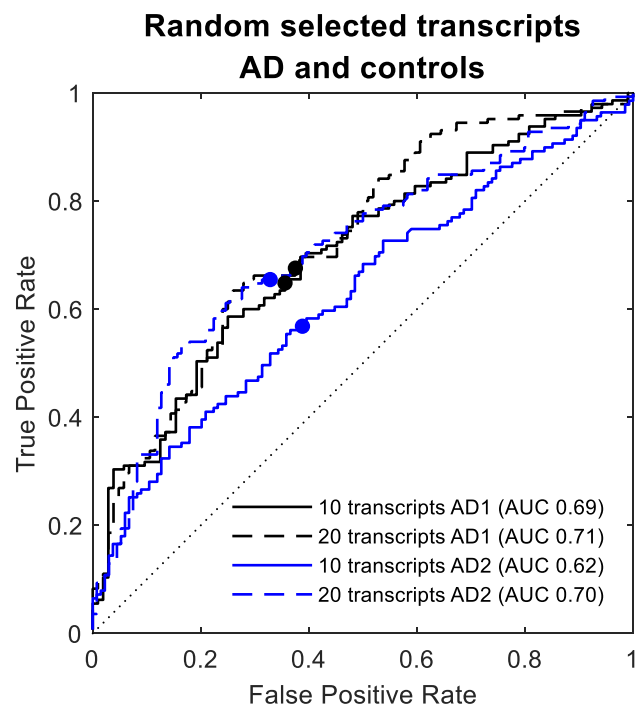

**Figure S1** Randomly selected transcripts performance in data. ROC for randomly generated set of 20 transcripts and a subset of 10 of those transcripts were tested on GSE63060 AD1 (black) and GSE63061 AD2 (blue). AUCs, calculated using discriminant scores for LDA. Dot marks LDA selected threshold for classification of disease from controls.

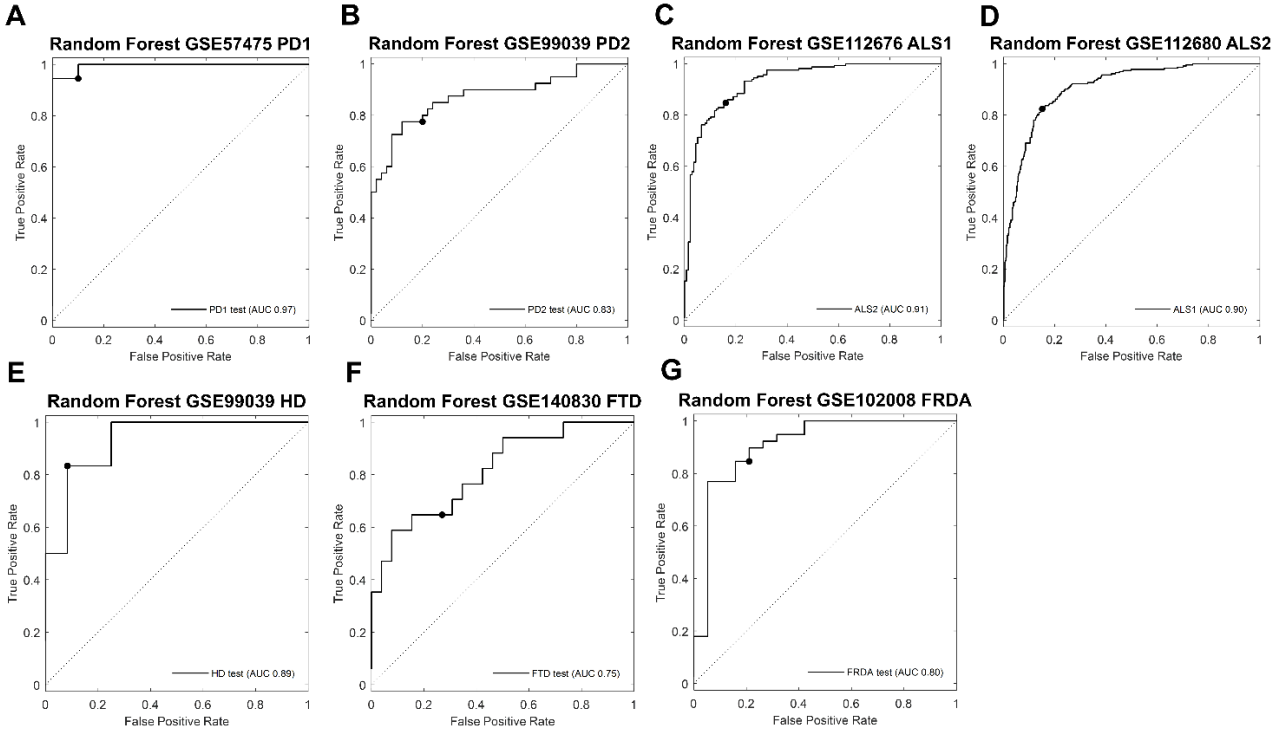

**Figure S2** Random forest other neurodegenerative diseases.

**A)** Top 20 Random forest transcript picks to select PD from controls. Trained and tested within GSE57475. Model# 71 was selected with sensitivity 94%. Receiver operator curves of discriminant scores generated from Linear discriminant analysis. LDA midpoint cutoff indicated on curves by solid dot. **B)** Top 20 Random forest transcript picks to select PD from controls. Trained and tested within GSE99039. Model #74 was selected with sensitivity 60%. Receiver operator curves of discriminant scores generated from Linear discriminant analysis. LDA midpoint cutoff indicated on curves by solid dot. **C)** Top 20 Random forest transcript picks to select other neurodegenerative diseases from controls. Trained on GSE112676 and tested on GSE112680. Model #33 was selected with sensitivity 74%. Receiver operator curves of discriminant scores generated from Linear discriminant analysis. LDA midpoint cutoff indicated on curves by solid dot. **D)** Top 20 Random forest transcript picks to select ALS from controls. Trained on GSE112680 and tested on GSE112676. Model #98 was selected with sensitivity 91%. Receiver operator curves of discriminant scores generated from Linear discriminant analysis. LDA midpoint cutoff indicated on curves by solid dot. **E)** Top 20 Random forest transcript picks to select HD from controls. Trained and tested within GSE99039. Model #48 was selected with sensitivity 83%. Because the number of transcripts cannot be larger than the number of samples in the test set (18 test samples), receiver operator curves of discriminant scores generated from Linear discriminant analysis performed on the top 10 transcripts only. LDA midpoint cutoff indicated on curves by solid dot. **F)** Top 20 Random forest transcript picks to select FTD from controls. Trained and tested within GSE140830. Model #25 was selected with sensitivity 71%. Receiver operator curves of discriminant scores generated from Linear discriminant analysis. LDA midpoint cutoff indicated on curves by solid dot. **G)** Top 20 Random forest transcript picks to select FRDA from controls. Trained and tested within GSE102008. Model #79 with sensitivity 79%. Receiver operator curves of discriminant scores generated from Linear discriminant analysis. LDA midpoint cutoff indicated on curves by solid dot.

**Table S2** LDA statistics for empirically selected transcripts

| 2017                               | Inflammation           | Epigenetics | Stress  | All     | Inflammation          | Epigenetics | Stress  | All     |
|------------------------------------|------------------------|-------------|---------|---------|-----------------------|-------------|---------|---------|
|                                    | <b>GSE63060 AD</b>     |             |         |         | <b>GSE63061 AD</b>    |             |         |         |
| <b>Wilks' <math>\Lambda</math></b> | 0.8425                 | 0.9069      | 0.8976  | 0.6957  | 0.9550                | 0.9575      | 0.9433  | 0.8552  |
| <b>DoF</b>                         | 7/241                  | 6/242       | 9/239   | 22/226  | 7/265                 | 6/266       | 9/263   | 22/250  |
| <b>p-value</b>                     | 1.0E-04                | 5.6E-04     | 1.9E-03 | 1.0E-04 | 9.1E-02               | 7.1E-02     | 7.7E-02 | 9.1E-03 |
| <b>Correct</b>                     | 66.67%                 | 62.25%      | 64.26%  | 74.70%  | 57.88%                | 58.97%      | 60.81%  | 68.13%  |
| <b>sensitivity</b>                 | 64.83%                 | 64.83%      | 64.42%  | 76.55%  | 57.55%                | 61.87%      | 59.71%  | 68.35%  |
| <b>specificity</b>                 | 69.23%                 | 58.65%      | 64.14%  | 72.12%  | 58.21%                | 55.97%      | 61.94%  | 67.91%  |
| <b>AUC</b>                         | 0.72                   | 0.65        | 0.66    | 0.80    | 0.61                  | 0.60        | 0.62    | 0.72    |
|                                    | <b>GSE112676 ALS</b>   |             |         |         | <b>GSE112680 ALS</b>  |             |         |         |
| <b>Wilks' <math>\Lambda</math></b> | 0.8702                 | 0.8547      | 0.7740  | 0.7443  | 0.9259                | 0.8333      | 0.8151  | 0.6736  |
| <b>DoF</b>                         | 7/733                  | 5/735       | 6/734   | 18/722  | 7/293                 | 5/295       | 6/294   | 18/282  |
| <b>p-value</b>                     | 1.0E-04                | 1.0E-04     | 1.0E-04 | 1.0E-04 | 1.9E-03               | 1.0E-04     | 1.0E-04 | 1.0E-04 |
| <b>Correct</b>                     | 67.61%                 | 69.23%      | 72.87%  | 73.95%  | 60.8%                 | 66.78%      | 68.44%  | 76.74%  |
| <b>sensitivity</b>                 | 55.36%                 | 57.94%      | 60.94%  | 63.52%  | 58.54%                | 65.85%      | 66.46%  | 73.17%  |
| <b>specificity</b>                 | 73.23%                 | 74.41%      | 78.35%  | 78.74%  | 63.5%                 | 67.88%      | 70.8%   | 81.02%  |
| <b>AUC</b>                         | 0.71                   | 0.72        | 0.77    | 0.79    | 0.65                  | 0.72        | 0.75    | 0.80    |
|                                    | <b>GSE57475 PD</b>     |             |         |         | <b>GSE99039 PD</b>    |             |         |         |
| <b>Wilks' <math>\Lambda</math></b> | 0.9396                 | 0.9807      | 0.9269  | 0.8635  | 0.9554                | 0.9794      | 0.9347  | 0.8884  |
| <b>DoF</b>                         | 7/134                  | 6/135       | 9/132   | 22/119  | 7/429                 | 6/430       | 9/427   | 22/414  |
| <b>p-value</b>                     | 2.9E-01                | 8.5E-01     | 3.3E-01 | 6.5E-01 | 6.3E-03               | 1.7E-01     | 6.4E-04 | 5.6E-04 |
| <b>Correct</b>                     | 59.86%                 | 59.86%      | 59.86%  | 68.31%  | 60.18%                | 55.84%      | 60.64%  | 62.7%   |
| <b>sensitivity</b>                 | 62.37%                 | 63.44%      | 59.14%  | 72.04%  | 61.46%                | 53.17%      | 58.05%  | 60.49%  |
| <b>specificity</b>                 | 55.1%                  | 53.06%      | 61.22%  | 61.22%  | 59.05%                | 58.19%      | 62.93%  | 64.66%  |
| <b>AUC</b>                         | 0.60                   | 0.55        | 0.61    | 0.67    | 0.61                  | 0.58        | 0.64    | 0.67    |
|                                    | <b>GSE140830 bvFTD</b> |             |         |         | <b>GSE102008 FRDA</b> |             |         |         |
| <b>Wilks' <math>\Lambda</math></b> | 0.9554                 | 0.9716      | 0.9683  | 0.9095  | 0.9772                | 0.9766      | 0.9750  | 0.9284  |
| <b>DoF</b>                         | 7/353                  | 6/354       | 9/351   | 22/338  | 7/497                 | 6/498       | 9/495   | 22/482  |
| <b>p-value</b>                     | 2.3E-02                | 1.1E-01     | 2.5E-01 | 6.2E-02 | 1.2E-01               | 6.5E-02     | 1.8E-01 | 2.6E-02 |
| <b>Correct</b>                     | 57.62%                 | 56.51%      | 59.28%  | 63.16%  | 59.21%                | 59.21%      | 58.42%  | 64.95%  |
| <b>sensitivity</b>                 | 63.75%                 | 60.0%       | 57.5%   | 60.0%   | 60.34%                | 59.12%      | 57.91%  | 63.26%  |
| <b>specificity</b>                 | 55.87%                 | 55.52%      | 59.79%  | 64.06%  | 54.26%                | 59.57%      | 60.64%  | 72.34%  |
| <b>AUC</b>                         | 0.63                   | 0.61        | 0.62    | 0.70    | 0.58                  | 0.60        | 0.60    | 0.68    |
|                                    | <b>GSE99039 HD</b>     |             |         |         | <b>GSE140829 AD</b>   |             |         |         |
| <b>Wilks' <math>\Lambda</math></b> | 0.9359                 | 0.9559      | 0.8791  | 0.8621  | 0.9574                | 0.9576      | 0.9352  | 0.8803  |
| <b>DoF</b>                         | 7/251                  | 6/252       | 9/249   | 22/236  | 7/445                 | 6/446       | 9/443   | 22/430  |
| <b>p-value</b>                     | 1.9E-021               | 7.5E-02     | 1.6E-04 | 2.7E-02 | 6.8E-03               | 3.5E-03     | 4.5E-04 | 1.0E-04 |
| <b>Correct</b>                     | 69.5%                  | 62.93%      | 76.83%  | 74.52%  | 57.17%                | 56.29%      | 62.03%  | 64.46%  |
| <b>sensitivity</b>                 | 59.26%                 | 66.67%      | 70.37%  | 66.67%  | 56.86%                | 55.88%      | 65.69%  | 63.73%  |
| <b>specificity</b>                 | 70.69%                 | 62.5%       | 77.59%  | 75.43%  | 57.43%                | 56.63%      | 59.04%  | 65.06%  |
| <b>AUC</b>                         | 0.68                   | 0.67        | 0.75    | 0.75    | --                    | --          | --      | --      |

DoF - degrees of freedom; AUC - area under curve; Correct - percent samples correctly classified; AD – Alzheimer's disease; bvFTD – behavioral variant frontotemporal dementia; ALS – Amyotrophic lateral sclerosis; FRDA – Friedreich's ataxia; PD – Parkinson's disease; HD – Huntington's disease

**Table S3** LDA statistics Random Forest AD GSE63060 and GSE63061

| Random Forest    | Training on<br>GSE63060 | Training on<br>GSE63061 | Training on<br>GSE63060 | Training on<br>GSE63061 |
|------------------|-------------------------|-------------------------|-------------------------|-------------------------|
|                  | <b>GSE63060 AD</b>      |                         | <b>GSE63061 AD</b>      |                         |
| Wilks' $\Lambda$ |                         | 0.5509                  | 0.6732                  |                         |
| DoF              |                         | 20/228                  | 20/252                  |                         |
| p-value          |                         | 1.0E-04                 | 1.0E-04                 |                         |
| Correct          |                         | 83.13%                  | 75.09%                  |                         |
| sensitivity      |                         | 84.83%                  | 71.22%                  |                         |
| specificity      |                         | 80.77%                  | 79.1%                   |                         |
| AUC              |                         | 0.87                    | 0.82                    |                         |
|                  | <b>GSE112676 ALS</b>    |                         | <b>GSE112680 ALS</b>    |                         |
| Wilks' $\Lambda$ | 0.7218                  | 0.8680                  | 0.5715                  | 0.8667                  |
| DoF              | 16/724                  | 9/734                   | 16/284                  | 9/294                   |
| p-value          | 1.0E-04                 | 1.0E-04                 | 1.0E-04                 | 1.0E-04                 |
| Correct          | 75.44%                  | 66.4%                   | 81.4%                   | 68.11%                  |
| sensitivity      | 76.82%                  | 63.09%                  | 84.76%                  | 67.07%                  |
| specificity      | 74.8%                   | 67.91%                  | 77.37%                  | 69.34                   |
| AUC              | 0.83                    | 0.71                    | 0.87                    | 0.70                    |
|                  | <b>GSE57475 PD</b>      |                         | <b>GSE99039 PD</b>      |                         |
| Wilks' $\Lambda$ | 0.8751                  | 0.9111                  | 0.9140                  | 0.9070                  |
| DoF              | 20/121                  | 15/126                  | 18/418                  | 12/424                  |
| p-value          | 6.3E-01                 | 6.5E-01                 | 3.6E-03                 | 1.0E-04                 |
| Correct          | 69.01%                  | 61.97%                  | 63.84%                  | 64.53%                  |
| sensitivity      | 74.19%                  | 63.44%                  | 61.46%                  | 61.95%                  |
| specificity      | 59.18%                  | 59.18%                  | 65.95%                  | 66.81%                  |
| AUC              | 0.67                    | 0.62                    | 0.67                    | 0.67                    |
|                  | <b>GSE140830 bvFTD</b>  |                         | <b>GSE102008 FRDA</b>   |                         |
| Wilks' $\Lambda$ | 0.9041                  | 0.8836                  | 0.9518                  | 0.9465                  |
| DoF              | 20/340                  | 20/340                  | 19/485                  | 17/487                  |
| p-value          | 1.9E-02                 | 1.9E-03                 | 1.8E-01                 | 5.5E-02                 |
| Correct          | 64.27%                  | 64.54%                  | 61.58%                  | 60.4%                   |
| sensitivity      | 65.0%                   | 71.25%                  | 62.04%                  | 61.56%                  |
| specificity      | 64.04%                  | 62.63%                  | 59.57%                  | 55.32%                  |
| AUC              | 0.70                    | 0.74                    | 0.63                    | 0.63                    |
|                  | <b>GSE99039 HD</b>      |                         | <b>GSE140829 AD</b>     |                         |
| Wilks' $\Lambda$ | 0.806                   | 0.9072                  | 0.8522                  | 0.8484                  |
| DoF              | 18/240                  | 11/247                  | 20/432                  | 20/432                  |
| p-value          | 1.0E-04                 | 1.1E-02                 | 1.0E-04                 | 1.0E-04                 |
| Correct          | 79.15%                  | 76.06%                  | 66.45%                  | 68.6%5                  |
| sensitivity      | 62.96%                  | 74.07%                  | 69.61%                  | 71.08%                  |
| specificity      | 81.03%                  | 76.29%                  | 63.86%                  | 66.67%                  |
| AUC              | 0.83                    | 0.80                    | 71%                     | 72%                     |

DoF - degrees of freedom; AUC - area under curve; Correct - percent samples correctly classified; AD – Alzheimer's disease; bvFTD – behavioral variant frontotemporal dementia; ALS – Amyotrophic lateral sclerosis; FRDA – Friedreich's ataxia; PD – Parkinson's disease; HD – Huntington's disease

**Table S4** LDA statistics Random forest transcripts other neurodegenerative diseases.

|                  | Train on         | Train on         | Training set 80% and Test set 20% |                |                |                    |                   |
|------------------|------------------|------------------|-----------------------------------|----------------|----------------|--------------------|-------------------|
| Random forest    | GSE112676<br>ALS | GSE112680<br>ALS | GSE57475<br>PD                    | GSE99039<br>PD | GSE99039<br>HD | GSE140830<br>bvFTD | GSE102008<br>FRDA |
| Wilks' $\Lambda$ | 0.5011           | 0.5757           | 0.1297                            | 0.5983         | 0.4884         | 0.6958             | 0.5483            |
| DoF              | 20/280           | 20/720           | 20/7                              | 20/69          | 10/7           | 20/22              | 20/37             |
| p-value          | 1.0E-04          | 1.0E-04          | 1.3E-01                           | 5.4E-03        | 6.8E-01        | 9.5E-01            | 1.3E-01           |
| Correct          | 84.39%           | 84.08%           | 100%                              | 78.89%         | 88.89%         | 69.77%             | 82.76%            |
| sensitivity      | 84.76%           | 82.4%            | 100%                              | 77.5%          | 83.33%         | 64.71%             | 84.62%            |
| specificity      | 83.94%           | 84.84%           | 100%                              | 80.0%          | 91.67%         | 73.08%             | 78.95%            |
| AUC              | 0.91             | 0.90             | 0.97                              | 0.83           | 0.89           | 0.75               | 0.80              |

DoF - degrees of freedom; AUC - area under curve; Correct - percent samples correctly classified; bvFTD – behavioral variant frontotemporal dementia; ALS – Amyotrophic lateral sclerosis; FRDA – Friedreich's ataxia; PD – Parkinson's disease; HD – Huntington's disease

## References

1. Sood, S., et al., *A novel multi-tissue RNA diagnostic of healthy ageing relates to cognitive health status*. Genome Biol, 2015. **16**: p. 185.
2. Lunnon, K., et al., *Mitochondrial dysfunction and immune activation are detectable in early Alzheimer's disease blood*. J Alzheimers Dis, 2012. **30**(3): p. 685-710.
3. Locascio, J.J., et al., *Association between alpha-synuclein blood transcripts and early, neuroimaging-supported Parkinson's disease*. Brain, 2015. **138**(Pt 9): p. 2659-71.
4. Shamir, R., et al., *Analysis of blood-based gene expression in idiopathic Parkinson disease*. Neurology, 2017. **89**(16): p. 1676-1683.
5. van Rheenen, W., et al., *Whole blood transcriptome analysis in amyotrophic lateral sclerosis: A biomarker study*. PLoS One, 2018. **13**(6): p. e0198874.
6. Swindell, W.R., et al., *ALS blood expression profiling identifies new biomarkers, patient subgroups, and evidence for neutrophilia and hypoxia*. J Transl Med, 2019. **17**(1): p. 170.
7. Nachun, D., et al., *Peripheral blood gene expression reveals an inflammatory transcriptomic signature in Friedreich's ataxia patients*. Hum Mol Genet, 2018. **27**(17): p. 2965-2977.
8. Lai, J.I., et al., *Transcriptional profiling of isogenic Friedreich ataxia neurons and effect of an HDAC inhibitor on disease signatures*. J Biol Chem, 2019. **294**(6): p. 1846-1859.
9. Du, P., W.A. Kibbe, and S.M. Lin, *nuID: a universal naming scheme of oligonucleotides for illumina, affymetrix, and other microarrays*. Biol Direct, 2007. **2**: p. 16.
